# Supplementary material for: Understanding influence of ocean waves on Arctic sea ice simulation: A modeling study with an atmosphere-ocean-wave-sea ice coupled model
Source: Copernicus journal article supplement (doi:10.5194/tc-2023-79), 2023-06-05
Supplement: Supplementary file 1 [file tc-2023-79-supplement.pdf]

Table S1 The seasonal maximum and minimum of simulated sea ice area ( $10^6 \text{ km}^2$ ) for all experiments.

| Year | Exp-CFSD | Exp-PFSD | Exp-LatMelt-C | Exp-LatMelt-P | Exp-WaveFrac-P | Exp-WaveAtt-C | Exp-WaveAtt-P |
|------|----------|----------|---------------|---------------|----------------|---------------|---------------|
| 2016 | 12.03    | 12.36    | 12.42         | 12.26         | 12.39          | 12.23         | 12.40         |
|      | 3.88     | 3.02     | 3.75          | 3.55          | 3.83           | 3.90          | 3.55          |
| 2017 | 12.62    | 12.41    | 12.77         | 12.61         | 12.84          | 12.53         | 12.10         |
|      | 3.95     | 3.19     | 4.33          | 4.09          | 3.50           | 4.08          | 3.71          |
| 2018 | 13.00    | 13.15    | 12.82         | 13.20         | 12.73          | 13.04         | 12.92         |
|      | 3.95     | 3.66     | 4.25          | 3.88          | 3.75           | 3.80          | 3.94          |
| 2019 | 14.12    | 12.98    | 13.22         | 13.40         | 12.94          | 13.19         | 13.31         |
|      | 4.77     | 4.12     | 4.67          | 4.49          | 4.31           | 4.56          | 4.31          |
| 2020 | 14.02    | 13.54    | 13.64         | 13.35         | 13.47          | 13.76         | 13.98         |
|      | 4.90     | 3.93     | 4.83          | 4.72          | 4.90           | 4.39          | 4.31          |

Table S2 The monthly mean of the sea ice mass budget terms (top melt and basal growth), net surface heat flux at the ice surface, and the conductive heat flux for selected months of Exp-CFSD (left values of each box) / Exp-PFSD (right values of each box).

| Time    | Top melt<br>(cm/day) | Basal growth<br>(cm/day) | Net surface heat flux<br>(W/m <sup>2</sup> ) | Conductive heat flux<br>(W/m <sup>2</sup> ) |
|---------|----------------------|--------------------------|----------------------------------------------|---------------------------------------------|
| 2016/07 | -0.102 / -0.058      | 0.002 / 0.003            | 11.90 / 6.42                                 | -1.96 / -2.95                               |
| 2017/01 | -0.000 / -0.000      | 0.421 / 0.440            | -42.46 / -45.06                              | -42.51 / -45.12                             |
| 2017/07 | -0.080 / -0.085      | 0.002 / 0.005            | 4.43 / 8.27                                  | -4.04 / -4.43                               |
| 2018/01 | -0.000 / -0.000      | 0.416 / 0.448            | -44.06 / -46.09                              | -44.15 / -46.15                             |
| 2018/07 | -0.176 / -0.049      | 0.003 / 0.006            | 18.93 / 3.08                                 | -1.71 / -3.51                               |
| 2019/01 | -0.000 / -0.000      | 0.449 / 0.454            | -45.40 / -46.38                              | -45.43 / -46.40                             |
| 2019/07 | -0.027 / -0.030      | 0.004 / 0.007            | 0.09 / -1.60                                 | -3.57 / -5.43                               |
| 2020/01 | -0.000 / -0.000      | 0.439 / 0.447            | -45.38 / -51.24                              | -45.42 / -51.25                             |
| 2020/07 | -0.037 / -0.081      | 0.003 / 0.006            | 1.58 / 4.30                                  | -3.06 / -3.63                               |

## MAR-Mean Sea Ice Concentration

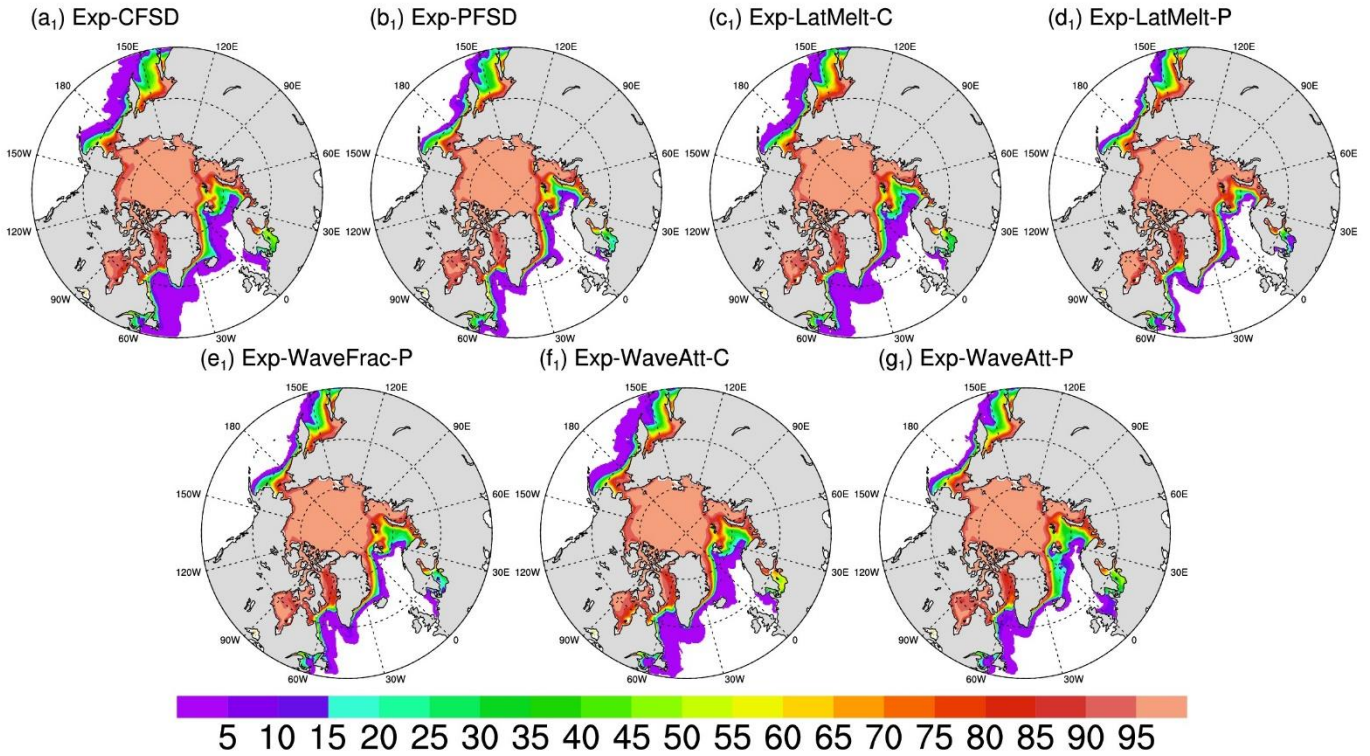

## SEP-Mean Sea Ice Concentration

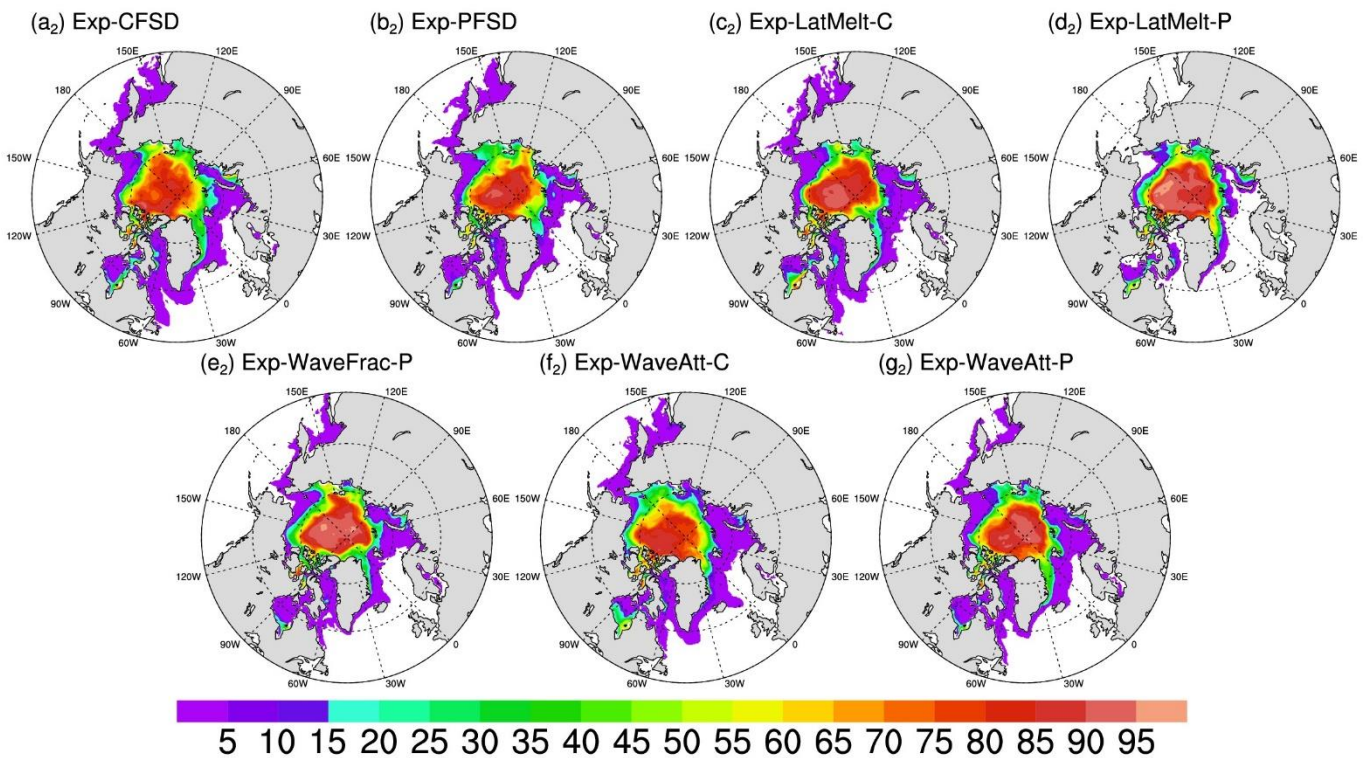

Figure S1 The March-averaged (upper panel and sub-index 1) and September-averaged (bottom panel and sub-index 2) sea ice concentration during 2016-2020 for (a) Exp-CFSD, (b) Exp-PFSD, (c) Exp-LatMelt-C, (d) Exp-LatMelt-P, (e) Exp-WaveFrac-P, (f) Exp-WaveAtt-C, and (g) Exp-WaveAtt-P.

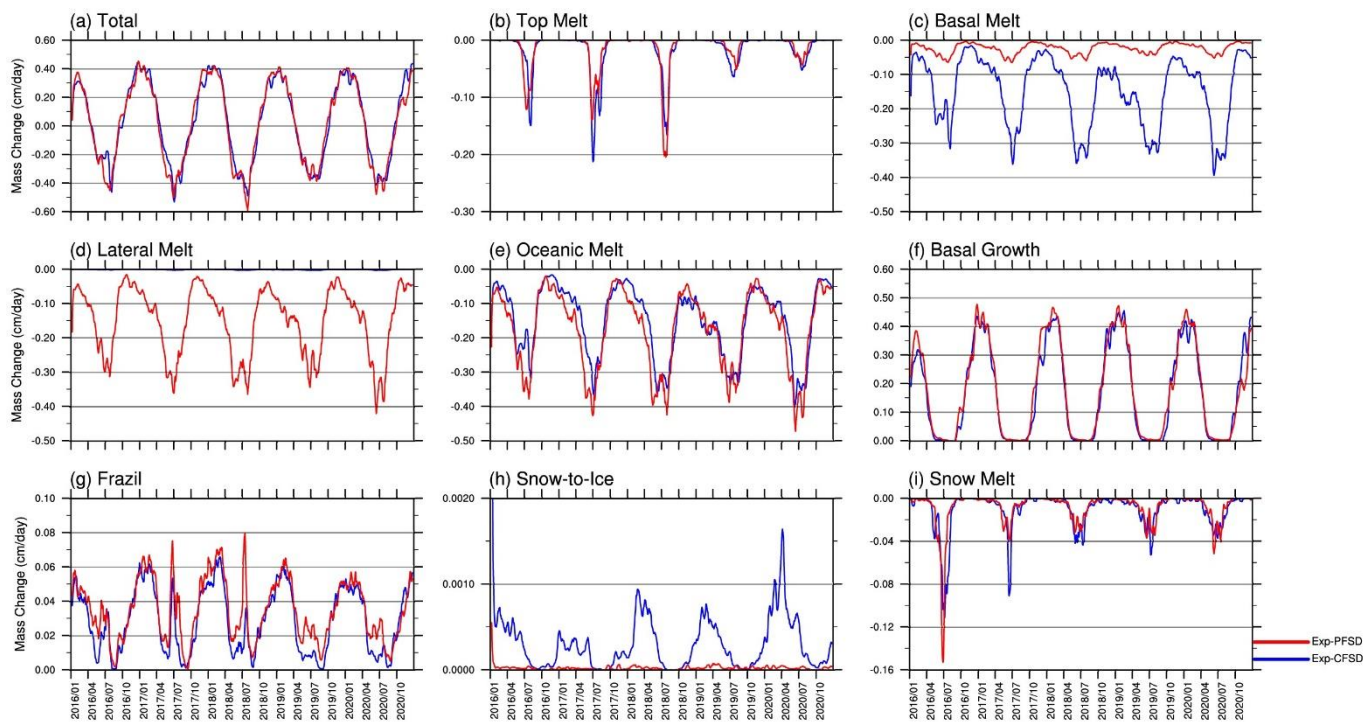

Figure S2 Time-series of (a) total mass change, (b) top melt, (c) basal melt, (d) lateral melt, (e) ice melt due to oceanic processes, (f) basal growth, (g) frazil ice formation, (h) snow to ice conversion, and (i) snow melt for Exp-CFSD (blue lines) and Exp-PFSD (red lines).

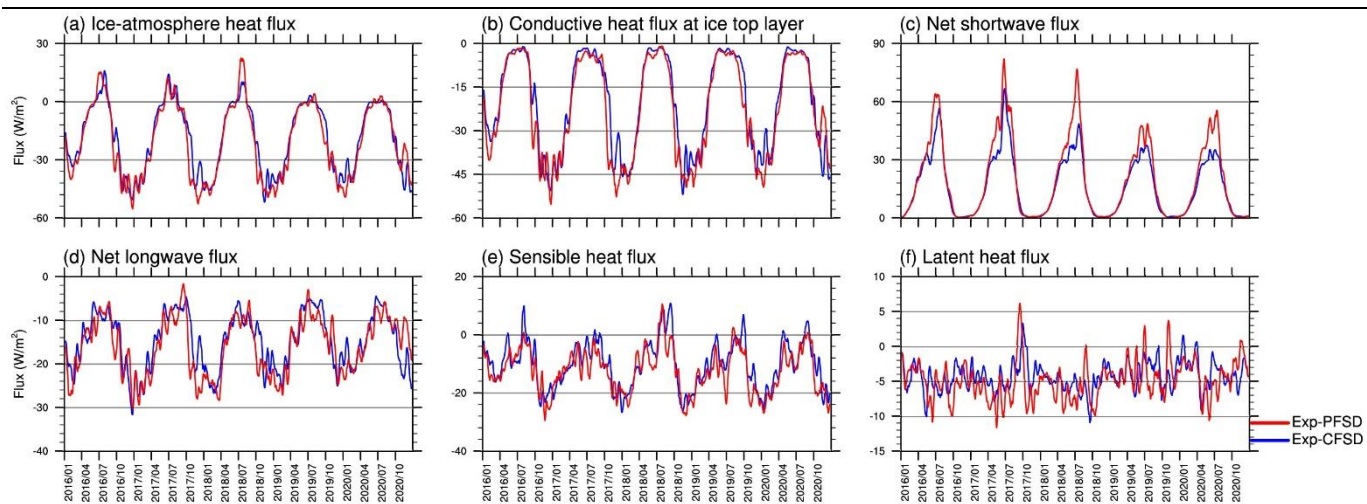

Figure S3 Same as Figure 5, but only for Exp-CFSD (blue line), and Exp-PFSD (red line).



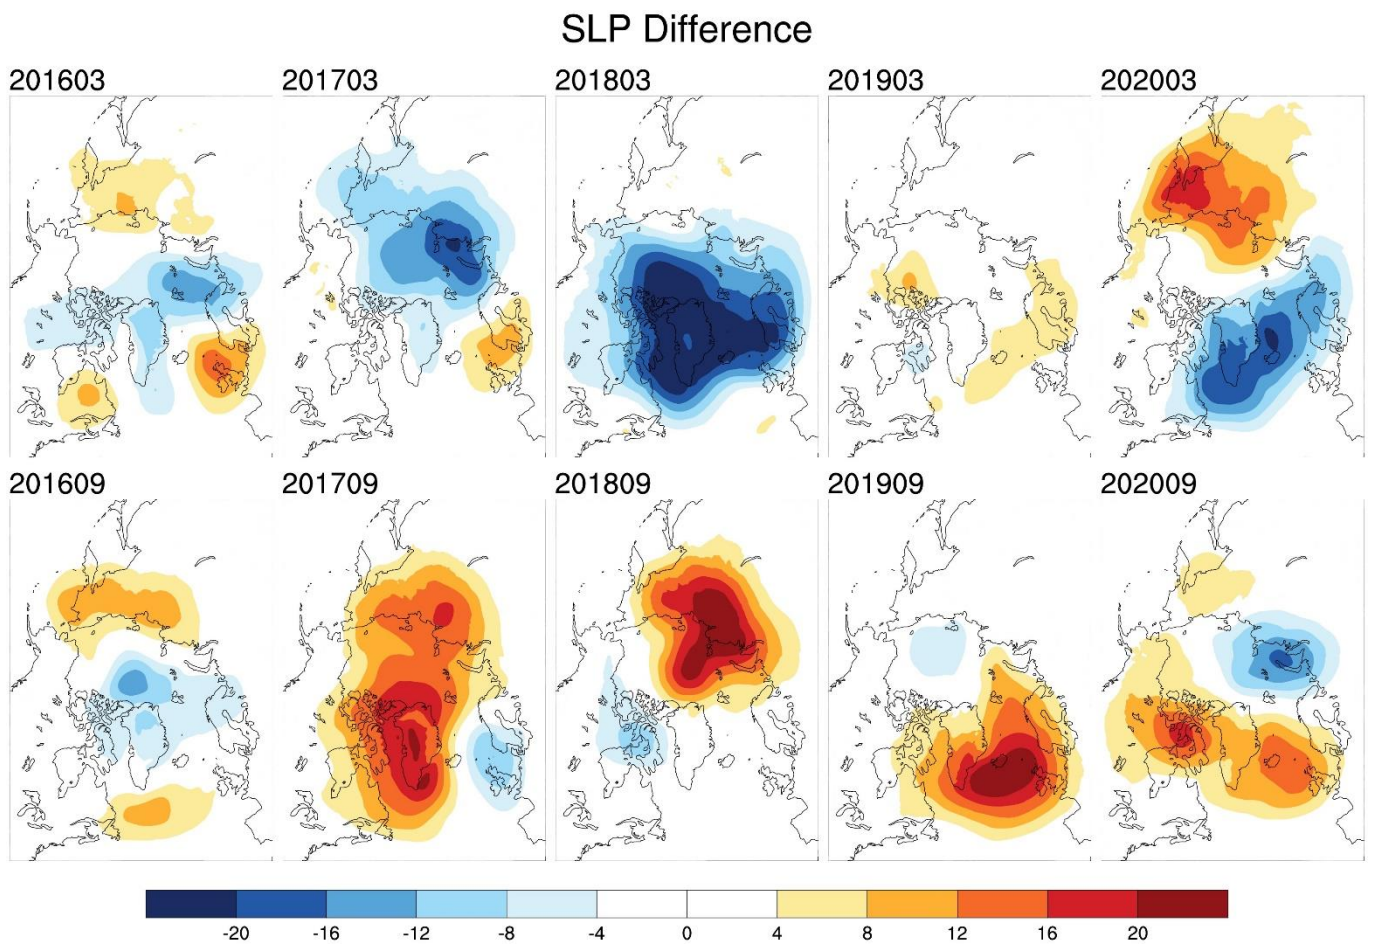

Figure S4 The difference of sea level pressure between Exp-PFSD and Exp-CFSD for March and September during 2016-2020.

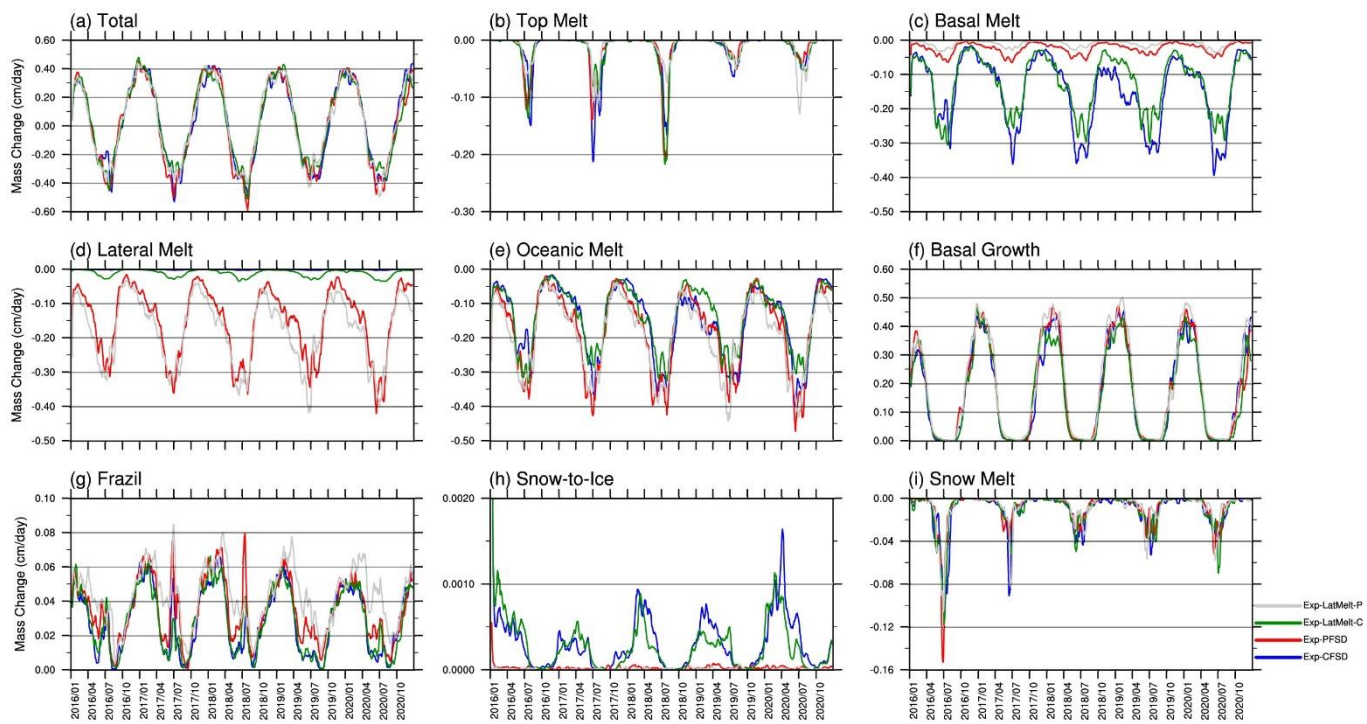

Figure S5 Same as Figure S2, but includes Exp-LatMelt-C (green lines) and Exp-LatMelt-P (grey lines).

## Lateral Growth (m/day)

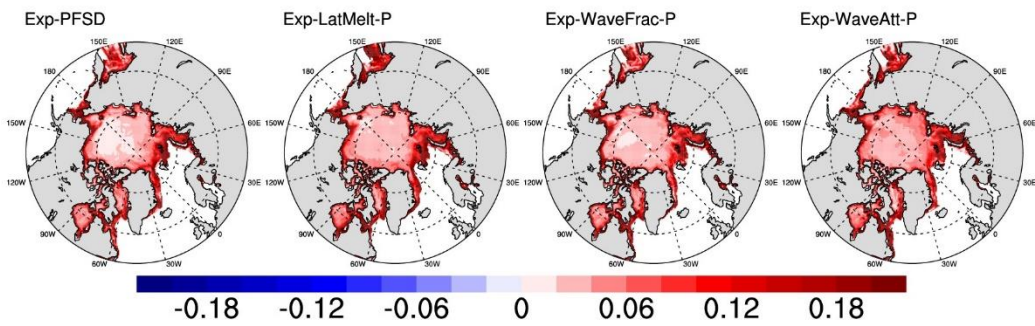

## Lateral Melting (m/day)

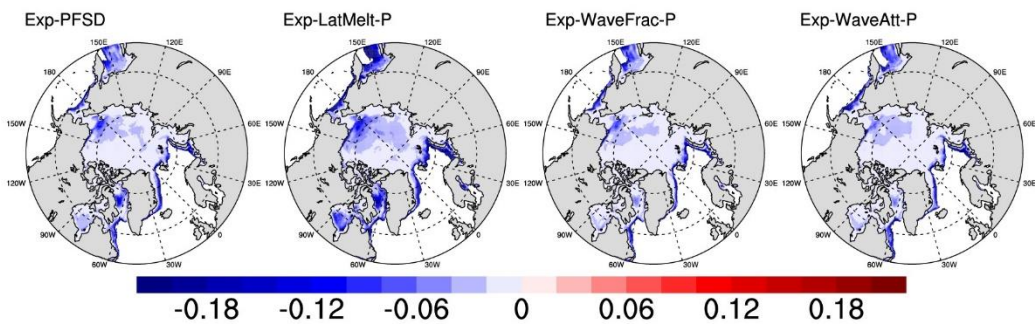

## Floe Welding (m/day)

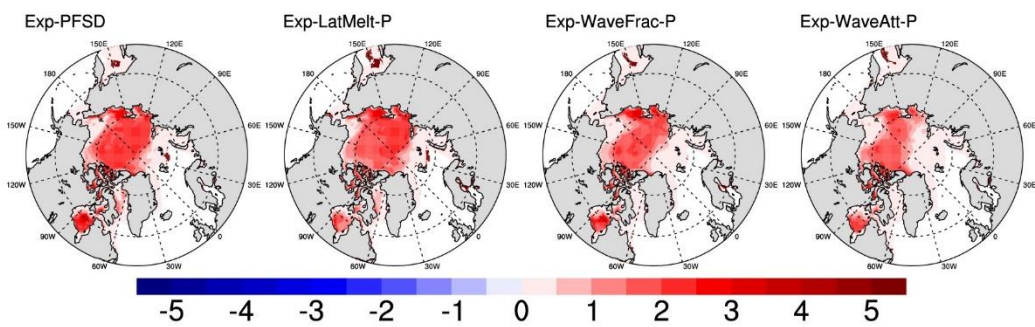

## Wave Fracturing (m/day)

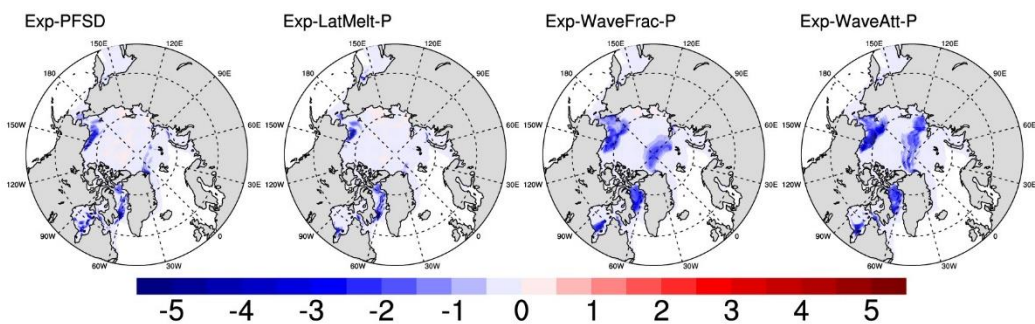

Figure S6 The tendency terms of the representative floe radius for all experiments using prognostic FSD averaged over 01.05.2016-03.31.2016.



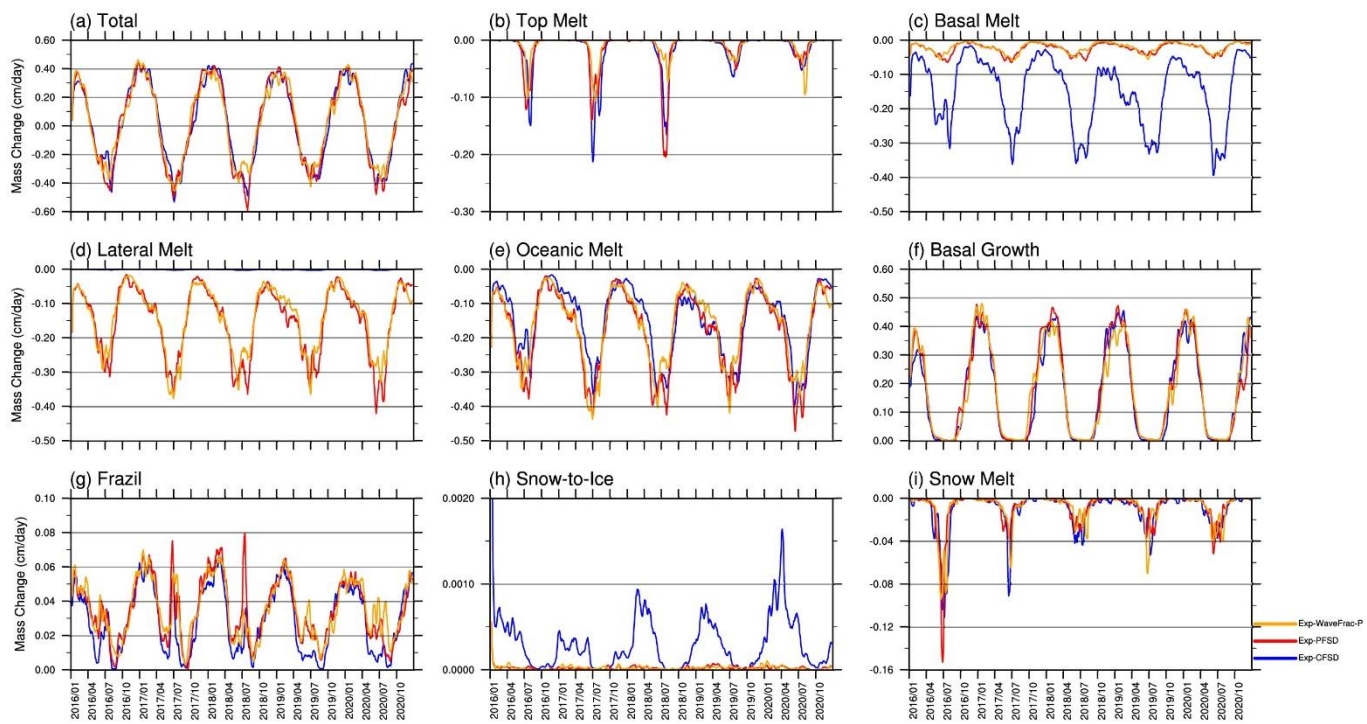

Figure S7 Same as Figure S2, but includes Exp-WaveFrac-P (orange lines).

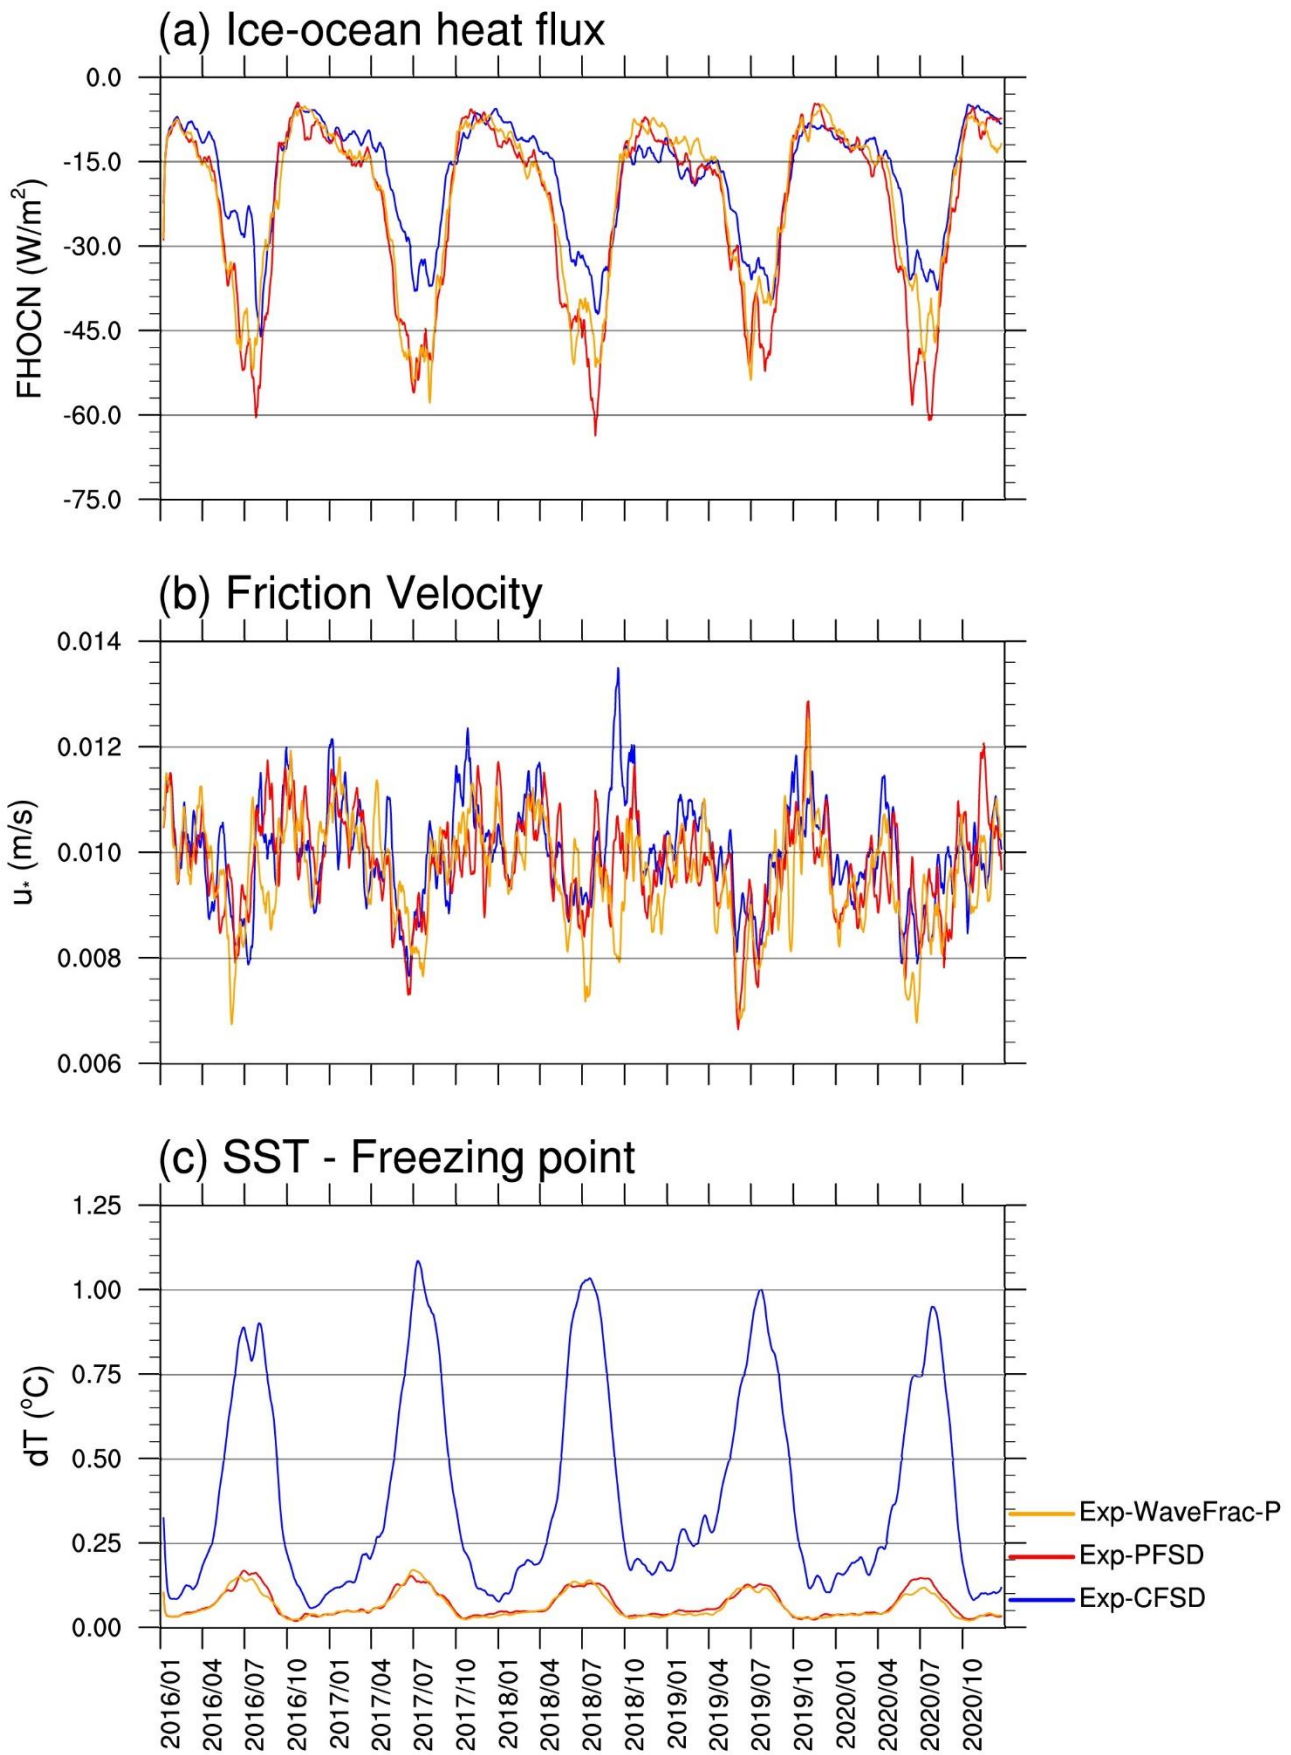

Figure S8 Same as Figure 4, but for Exp-CFSD (blue lines), Exp-PFSD (red lines), and Exp-WaveFrac-P (orange lines).

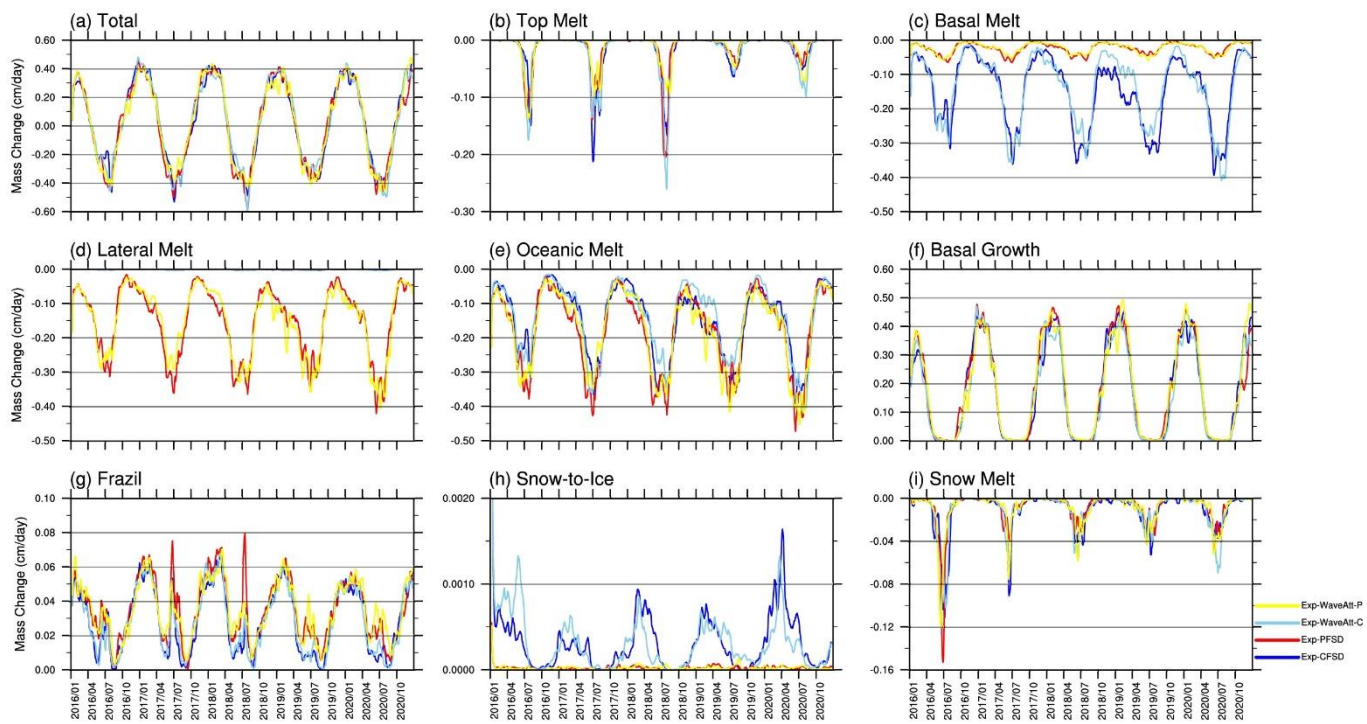

Figure S9 Same as Figure S2, but includes Exp-WaveAtt-C (light-blue lines) and Exp-WaveAtt-P (yellow lines).

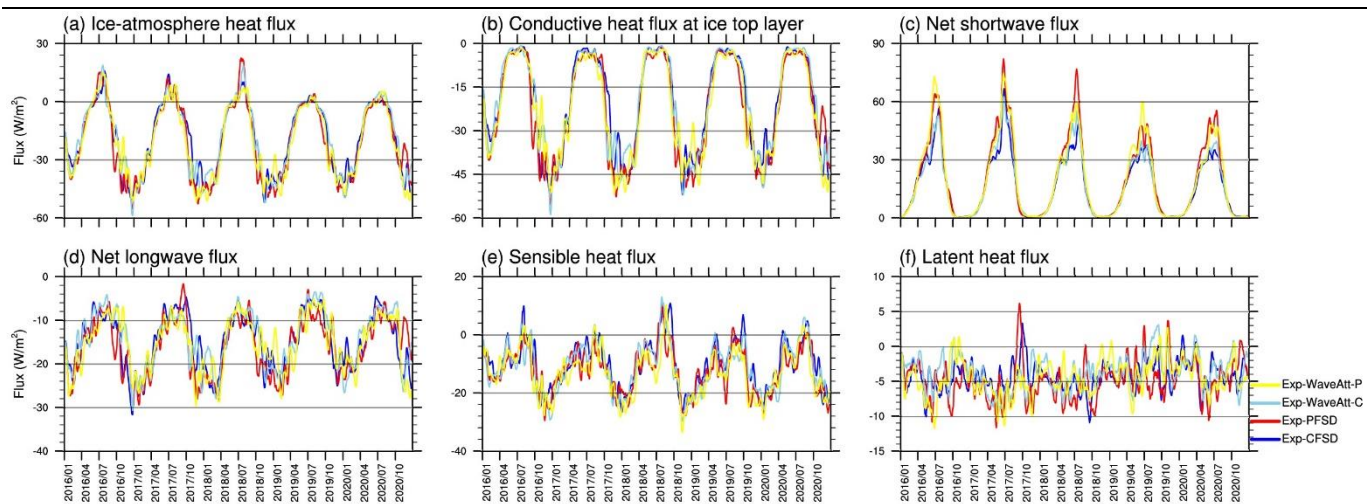

Figure S10 Same as Figure 5, but for Exp-CFSD (blue line), Exp-PFSD (red line), Exp-WaveAtt-C (light-blue line), and Exp-WaveAtt-P (yellow line).
